# Supplementary material for: Divergent landscapes of A-to-I editing in postmortem and living human brain
Source: PubMed Central journal article supplement (PMC11208617; doi:10.1038/s41467-024-49268-z), 2024-06-26
Supplement: 41467_2024_49268_MOESM3_ESM.pdf [file 41467_2024_49268_MOESM3_ESM.pdf]

## **Description of Additional Supplementary Information**

**Supplemental Data 1:** Summary of Living Brain Project demographics and RNA editing metrics, including external postmortem datasets

**Supplemental Data 2:** RNA editing summary statistics across the Living Brain Project as well as additional secondary in vitro and in vivo experiments.

**Supplemental Data 3:** RNA editing summary metrics across secondary postmortem cohorts.

**Supplemental Data 4:** Cell-specific cataloging of A-to-I sites in postmortem human cortex.

**Supplemental Data 5:** RNA editing quantitative trait loci in the Living Brain Project.
